# Supplementary material
Source: PubMed Central journal article supplement (PMC8157957)
Supplement: pnas.2025208118.sapp.pdf [file pnas.2025208118.sapp.pdf]

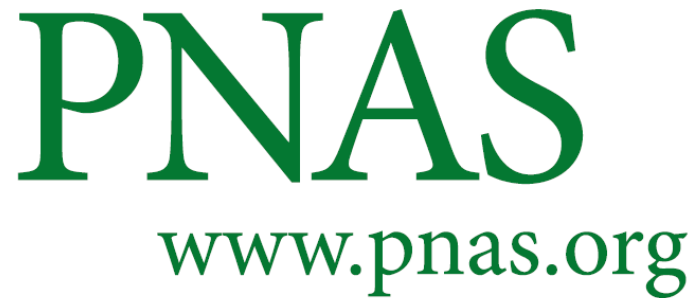

## Supplementary Information for

### **AP-3-dependent targeting of flippase ATP8A1 to lamellar bodies suppresses activation of YAP in alveolar epithelial type 2 cells.**

Seunghyi Kook<sup>1</sup>, Ping Wang<sup>1</sup>, Shufang Meng<sup>1</sup>, Christopher S. Jetter<sup>1</sup>, Jennifer M.S. Sucre<sup>1</sup>, John T. Benjamin<sup>1</sup>, Jason J. Gokey<sup>2</sup>, Hayley A. Hanby<sup>3,4</sup>, Alexa Jaume<sup>3</sup>, Laura Goetzl<sup>5</sup>, Michael S. Marks<sup>3,6</sup>, Susan H. Guttentag<sup>1,\*</sup>

\*Corresponding author: Susan Guttentag, MD, 11111 Doctor's Office Tower,  
2200 Children's Way, Nashville, TN 37232  
**Email:** [susan.guttentag@vumc.org](mailto:susan.guttentag@vumc.org)  
**ORCID identifier:** <https://orcid.org/0000-0003-4420-5879>

#### **This PDF file includes:**

Figures S1 to S8  
Tables S1 to S2  
Legends for Movies SV1 to SV8  
SI References

#### **Other supplementary materials for this manuscript include the following:**

Movies SV1 to SV8

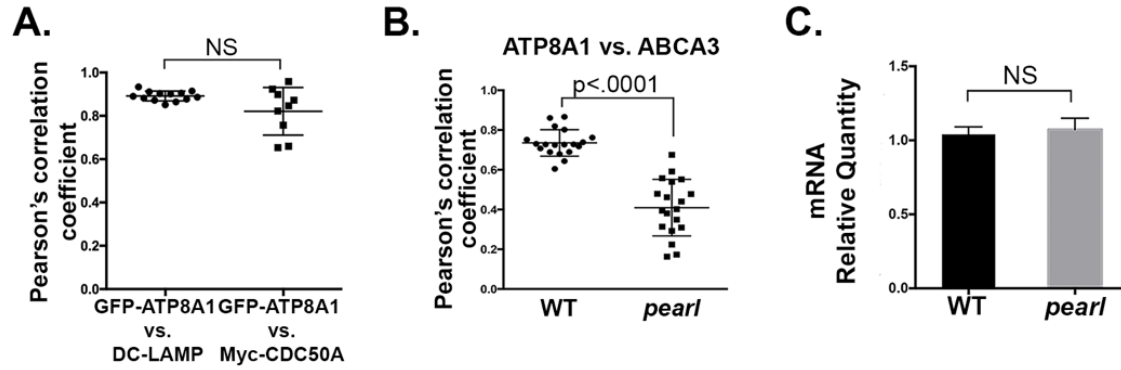

**Figure S1:**

A. Pearson's correlation coefficient acquired from images of transfected primary human AT2 cells in Figure 1B, comparing GFP-ATP8A1 with endogenous DC-LAMP and with exogenous Myc-tagged CDC50A (n=3 experiments; mean  $\pm$  standard error).

B. Pearson's correlation coefficient acquired from images of primary mouse AT2 cells in Figure 1C, comparing endogenous ABCA3 and ATP8A1 (n=3 experiments; mean  $\pm$  standard error).

C. RNA expression of *Atp8a1* in primary mouse AT2 cells. Quantitative RT-PCR for *Atp8a1* RNA from primary AT2 cells from WT and *pearl* mice (n=4; NS, not significant; mean  $\pm$  standard error).

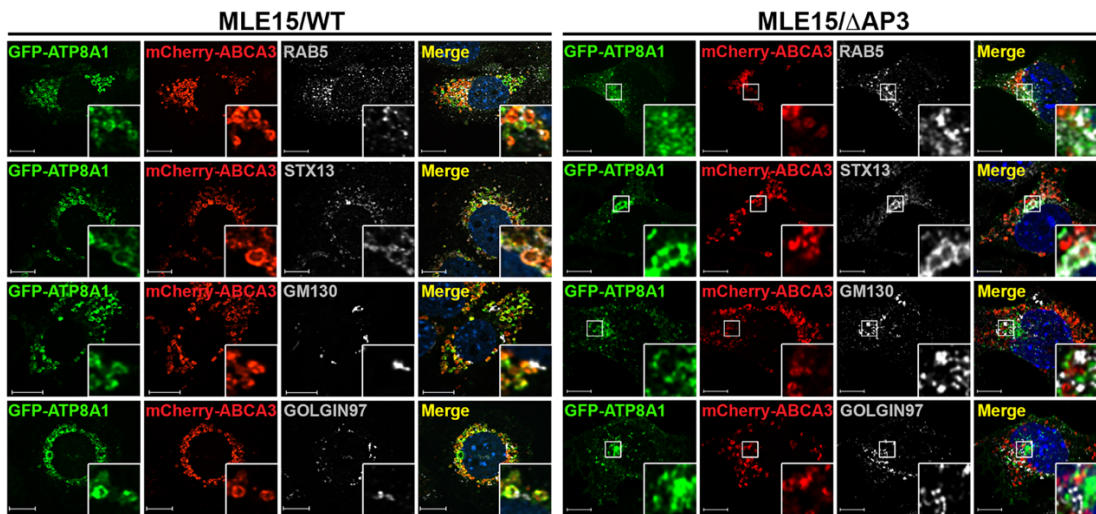

**Figure S2: GFP-ATP8A1 localization to more proximal subcellular compartments in MLE15/WT and MLE15/ $\Delta$ AP3 cells.**

Representative confocal images of MLE15/WT and MLE15/ $\Delta$ AP3 cells expressing exogenous GFP-ATP8A1 and mCherry-ABCA3, and immunostained for endogenous RAB5, STX13, GM130, and GOLGIN97 (scale bar = 10 microns).

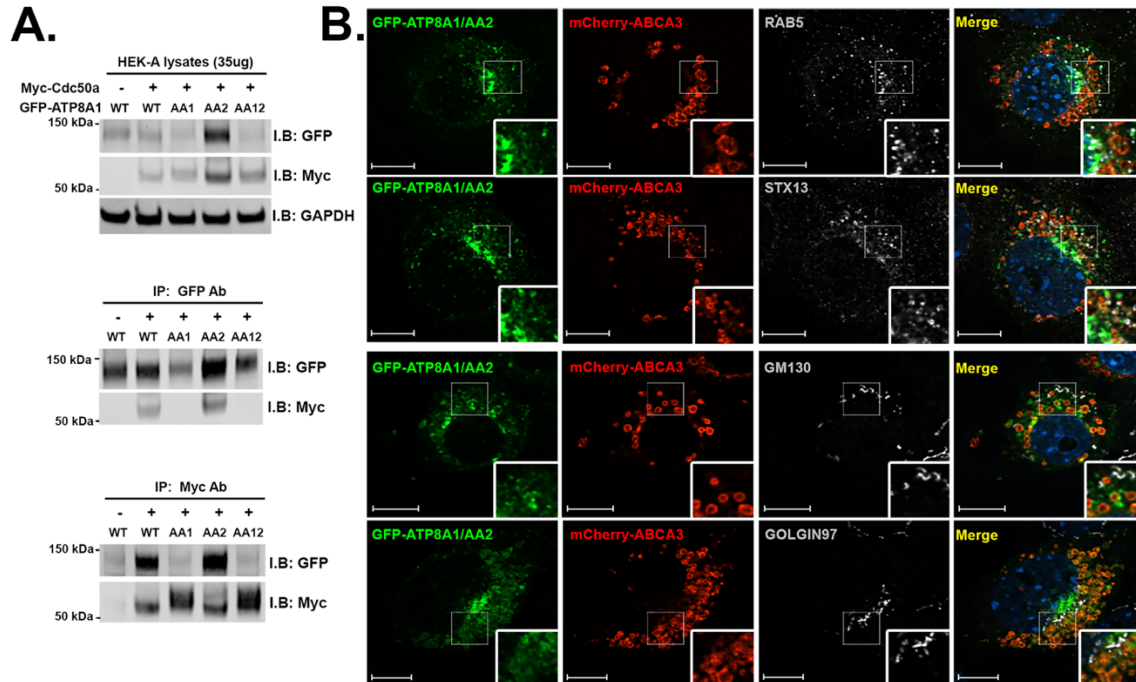

**Figure S3: GFP-ATP8A1-AA2 localization to more proximal subcellular compartments in MLE15/WT cells.**

A. Protein expression and coimmunoprecipitation of mutagenized GFP-ATP8A1 in HEK cells. Immunoblotting of HEK lysates (35  $\mu$ g per lane) is shown using anti-GFP antibody or anti-Myc antibody in the upper panel. Co-immunoprecipitation utilizing anti-GFP (middle panel) or anti-Myc (bottom panel) was done using 500  $\mu$ g of input lysate (representative of 2 experiments).

B. Representative confocal images of MLE15/WT cells expressing mCherry-ABCA3 and GFP-ATP8A1-AA2, with immunostaining for RAB5, STX13, GM130, and GOLGIN97 (scale bars = 10 microns).

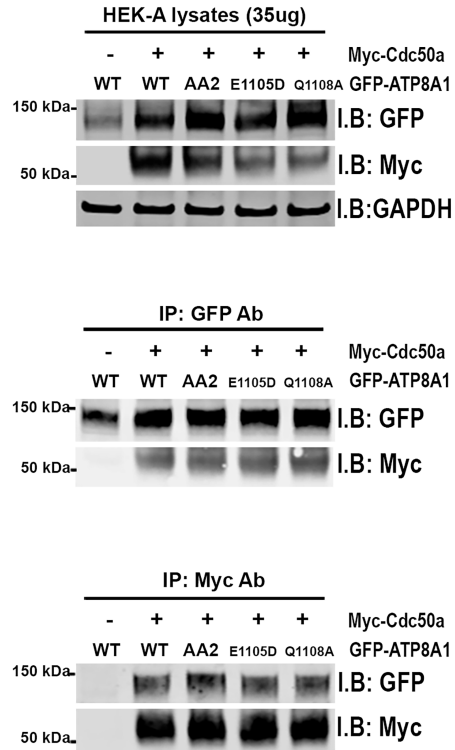

**Figure S4. GFP-ATP8A1-E1105D and GFP-ATP8A1-Q1108A bind myc-CDC50A.**

Protein expression and co-immunoprecipitation of mutagenized GFP-ATP8A1 in HEK cells. Immunoblotting of HEK lysates (35  $\mu$ g per lane) is shown using anti-GFP antibody or anti-Myc antibody in the upper panel. Co-immunoprecipitation utilizing anti-GFP antibodies (middle panel) or anti-Myc antibodies (bottom panel) used 500  $\mu$ g of input lysate (representative of 2 experiments).

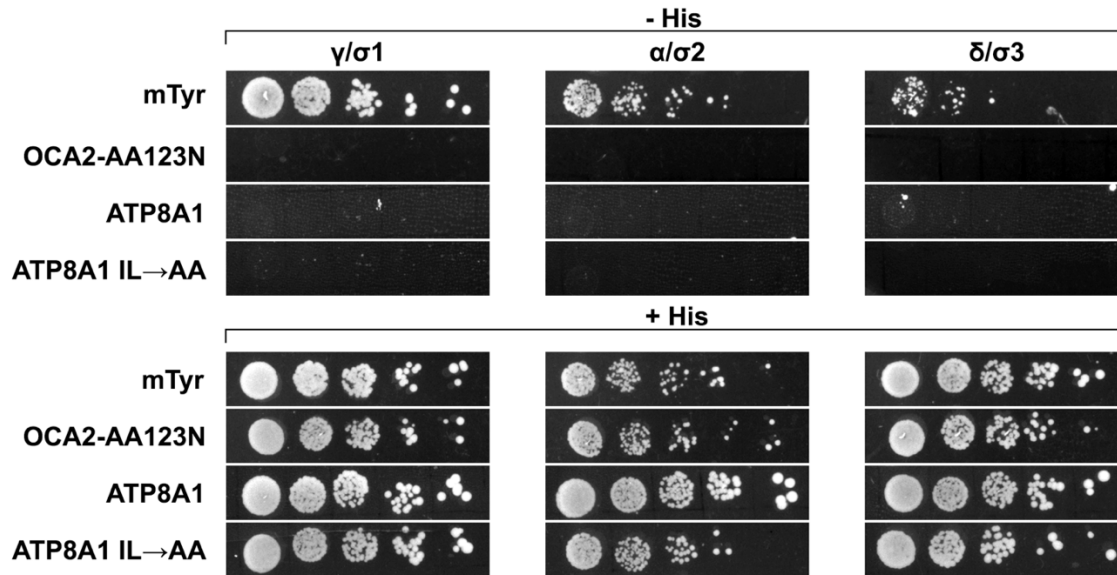

**Figure S5: Yeast 3-hybrid assay to assess binding between the <sup>1105</sup>ERAQLL and AP-3.**

To test whether the <sup>1105</sup>ERAQLL motif of ATP8A1 binds to AP-3, we employed a previously described, highly sensitive yeast 3-hybrid assay (1) in which the GAL4 transcription factor activation domain was fused to the  $\gamma$ ,  $\alpha$  or  $\delta$  subunit of AP-1, -2, or -3 respectively and co-expressed in *cerevisiae* H57c cells with the corresponding s subunit ( $\sigma 1$  for AP-1,  $\sigma 2$  for AP-2 and  $\sigma 3A$  for AP-3) and the GAL4 DNA binding domain (DBD) fused to the C-terminal cytoplasmic domain (residues 1071 to 1164) of human ATP8A1. Whereas the positive control – the Gal4 DBD fused to the cytoplasmic domain of mouse tyrosinase (mTyr) (2, 3) yielded a robust interaction as detected by growth of yeast on plates lacking histidine, neither the negative control (OCA2-AA123N;(3)) nor WT or dileucine mutant variants of the ATP8A1 cytoplasmic domain yielded a positive interaction.



and MLE15/ $\Delta$ AP3 starting cells, and two clones demonstrating successful deletions of 29 bp in exon 1 of *Atp8a1*.

C. Live cell imaging of MLE15/WT, MLE15/ $\Delta$ AP3, MLE15/ $\Delta$ ATP8A1, and MLE15/ $\Delta$ AP3- $\Delta$ ATP8A1 cells. Representative pseudocolor images captured from live cell imaging of MLE15/WT, MLE15/ $\Delta$ AP3, MLE15/ $\Delta$ ATP8A1, and MLE15/ $\Delta$ AP3- $\Delta$ ATP8A1 cells expressing the biosensor mCherry-LactC2 (pseudocolor Green) and GFP-Rab11A (pseudocolor Magenta; scale bars = 10 microns). Live cell imaging was obtained using identical microscope settings, and still images were derived from the first frame to avoid photobleaching.

D. Colocalization correlation between GFP-RAB11A (pseudocolor Magenta) and mCherry-LactC2 (pseudocolor Green) acquired from images described in S6C (n=5-8 cells per group, mean  $\pm$  standard error). The method used for colocalization was adapted from Dennis et al (4) (see Methods).



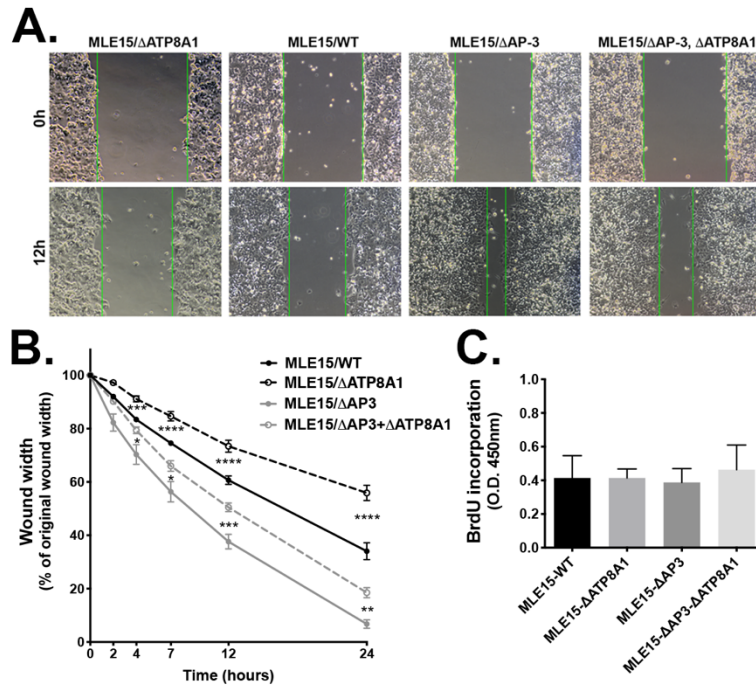

**Figure S7: Activation of YAP in MLE15/ΔAP3 cells hastens scratch wound healing in an ATP8A1-dependent manner.**

A. Composite of phase contrast images depicting scratch wound of confluent monolayer of MLE15/ΔATP8A1, MLE15/WT, MLE15/ΔAP3, and MLE15/ΔAP3-ΔATP8A1 cells immediately post-wounding and 12 h after wounding.

B. Time course of wound closure after scratch wounding (see Methods). MLE15/WT cells ± ATP8A1 and MLE15/ΔAP3 cells ± ATP8A1 were monitored over 24h as they closed the wound depicted in panel A. MLE15/ΔAP3 cells closed a scratch wound faster than MLE15/WT cells (1h  $p < .05$ , 2-4h  $p < .001$ , and 7-24h  $p < .0001$ ; asterisks not provided on graph). Loss of ATP8A1 slowed closure in both MLE15/WT and MLE15/ΔAP3 cells ( $n = 3$  experiments with triplicate samples at each timepoint; \* $p < .05$ , \*\* $p < .01$ , \*\*\* $p < .001$  with the asterisks placed between the MLE15/WT and MLE15/ΔATP8A1, or MLE15/ΔAP3 and MLE15/ΔAP3-ΔATP8A1 cells, respectively).

C. Proliferation of MLE15/WT, MLE15/ΔAP3, MLE15/ΔATP8A1, and MLE15/ΔAP3-ΔATP8A1 cells as measured by BrdU incorporation (see Methods) over 8 h. No significant differences were detected ( $n = 2$  experiments performed with quadruplicate samples).

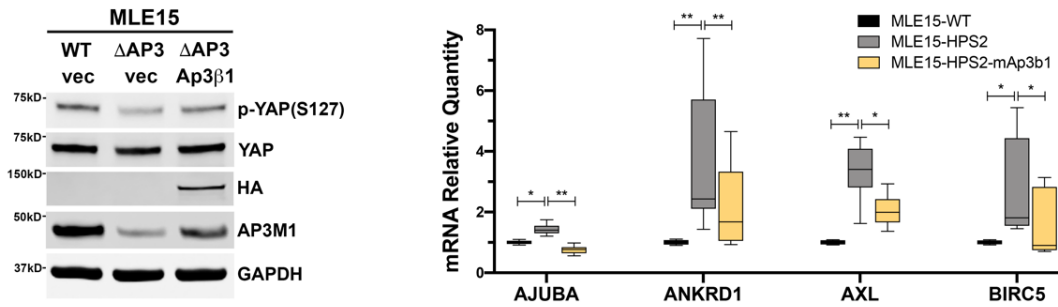

**Figure S8:** Rescue of YAP activation by restoring AP-3 in MLE15/ $\Delta$ AP3 cells.

Left panel: Composite representative immunoblot from MLE15/WT and MLE15/ $\Delta$ AP3 cells expressing from empty vector, and MLE15/ $\Delta$ AP3 cells expressing *Ap3b1*-HA, as described in Figure 2 (representative of 3 biologic comparisons).

Right panel: RT-qPCR for *Ajuba*, *Ankrd1*, *Axl*, *Birc5* RNA (n= triplicate samples of 3 biologic replicates; n=3; box and whiskers plot as described in Figure 7A; \*p < .05, \*\*p < .01, \*\*\*p < .001, \*\*\*\*p < .0001).

## Supplemental Tables

Table S1: gRNA sequences used for inactivating *Ap1g1* and *Atp8a1*.

| Target Gene | gRNA name      | gRNA Sequence (5'→3')     | Genomic PCR primers (5'→3') |                        |
|-------------|----------------|---------------------------|-----------------------------|------------------------|
| Ap1γ1       | Ap1γ1-gRNA#3   | CACCGATCACTGTAAGAGAAAAAG  | Forward                     | GAAACTTTGTTAGGCTGCTTCG |
|             | Ap1 γ 1-gRNA#5 | CACCGTGCAGAGATCTTGC GGAG  | Reverse                     | CTTTCAAAAATAAGTGCCCTGG |
| ATP8a1      | ATP8a1-gRNA#5  | CACCGACTCACCTTCCGCGCGGAG  | Forward                     | GTGACAGGTGCAGGGTCC     |
|             | ATP8a1-gRNA#14 | CACCGCTGTCGAGATGCCGACCATG | Reverse                     | GGTGTAGATGGGATGAGGTGTC |

Table S2: Primers used to construct *Atp8a1* mutations of dileucine motifs.

| Mutant | 1 <sup>st</sup> PCR |                                           |             |                                            | 2 <sup>nd</sup> PCR |                          |
|--------|---------------------|-------------------------------------------|-------------|--------------------------------------------|---------------------|--------------------------|
|        | 5' fragment         |                                           | 3' fragment |                                            |                     |                          |
| AA1    | F                   | TACACTGGACATGACACCAAG                     | F           | CAGGAAGAAAGATATGAAGCGGCCAATGTCTTGGAGTTTACC | F                   | TACACTGGACATGACACCAAG    |
|        | R                   | GGTAAACTCCAAGACATTGGCCGCTTCATATCTTTCTTCTG | R           | ATTAGCTGCCTGCAGGCCTTCATT                   | R                   | ATTAGCTGCCTGCAGGCCTTCATT |
| AA2    | F                   | AATGAAGGCCTGCAGGCAGCTAAT                  | F           | CTGACCGAGAGGGCGCAAGCGGCCAAGAAGCTCTTTAAGAAG | F                   | AATGAAGGCCTGCAGGCAGCTAAT |
|        | R                   | CTTCTTAAAGACGTTCTTGGCCGCTTGGCCCTCTCGGACAG | R           | GCGGATCCCGGGTCACCATTC                      | R                   | GCGGATCCCGGGTCACCATTC    |
| E1105D | F                   | AATGAAGGCCTGCAGGCAGCTAAT                  | F           | GGAAAAAGCCTGACCGACAGGGCGCAACTGCTCAAG       | F                   | AATGAAGGCCTGCAGGCAGCTAAT |
|        | R                   | CTTGAGCAGTTGCGCCCTGTCGGTCAGGCTTTTCC       | R           | GCGGATCCCGGGTCACCATTC                      | R                   | GCGGATCCCGGGTCACCATTC    |
| Q1108A | F                   | AATGAAGGCCTGCAGGCAGCTAAT                  | F           | CTGACCGAGAGGGCGGCACCTCAAGAAGCTCTTT         | F                   | AATGAAGGCCTGCAGGCAGCTAAT |
|        | R                   | AAAGACGTTCTTGAGCAGTGCCGCCCTCTCGGTCAG      | R           | GCGGATCCCGGGTCACCATTC                      | R                   | GCGGATCCCGGGTCACCATTC    |

### **Supplemental Videos**

**Supplemental Videos SV1-SV4:** Live cell imaging MLE15/WT (SV1), MLE15/ $\Delta$ AP3 (SV2), MLE15/ $\Delta$ ATP8A1 (SV3), and MLE15/ $\Delta$ AP3- $\Delta$ ATP8A1 (SV4) cells expressing mCherry-ABCA3 and the biosensor GFP-LactC2 used to generate still images in Figure 7.

**Supplemental Videos SV5-SV8:** Live cell imaging MLE15/WT (SV5), MLE15/ $\Delta$ AP3 (SV6), MLE15/ $\Delta$ ATP8A1 (SV7), and MLE15/ $\Delta$ AP3- $\Delta$ ATP8A1 (SV8) cells expressing GFP-RAB11 (pseudocolored Magenta) and the biosensor mCherry-LactC2 (pseudocolored Green) used to generate still images in Supplemental Figure 6.

## SI References

1. K. Janvier, *et al.*, Recognition of dileucine-based sorting signals from HIV-1 Nef and LIMP-II by the AP-1  $\gamma$ - $\sigma$ 1 and AP-3  $\delta$ - $\sigma$ 3 hemicomplexes. *J Cell Biology* **163**, 1281–1290 (2003).
2. A. C. Theos, *et al.*, Functions of Adaptor Protein (AP)-3 and AP-1 in Tyrosinase Sorting from Endosomes to Melanosomes. *Mol Biol Cell* **16**, 5356–5372 (2005).
3. A. Sitaram, *et al.*, Differential recognition of a dileucine-based sorting signal by AP-1 and AP-3 reveals a requirement for both BLOC-1 and AP-3 in delivery of OCA2 to melanosomes. *Mol Biol Cell* **23**, 3178–3192 (2012).
4. M. K. Dennis, *et al.*, BLOC-2 targets recycling endosomal tubules to melanosomes for cargo delivery. *J Cell Biology* **209**, 563–577 (2015).
